# Supplementary material
Source: PubMed Central journal article supplement (PMC2605320)

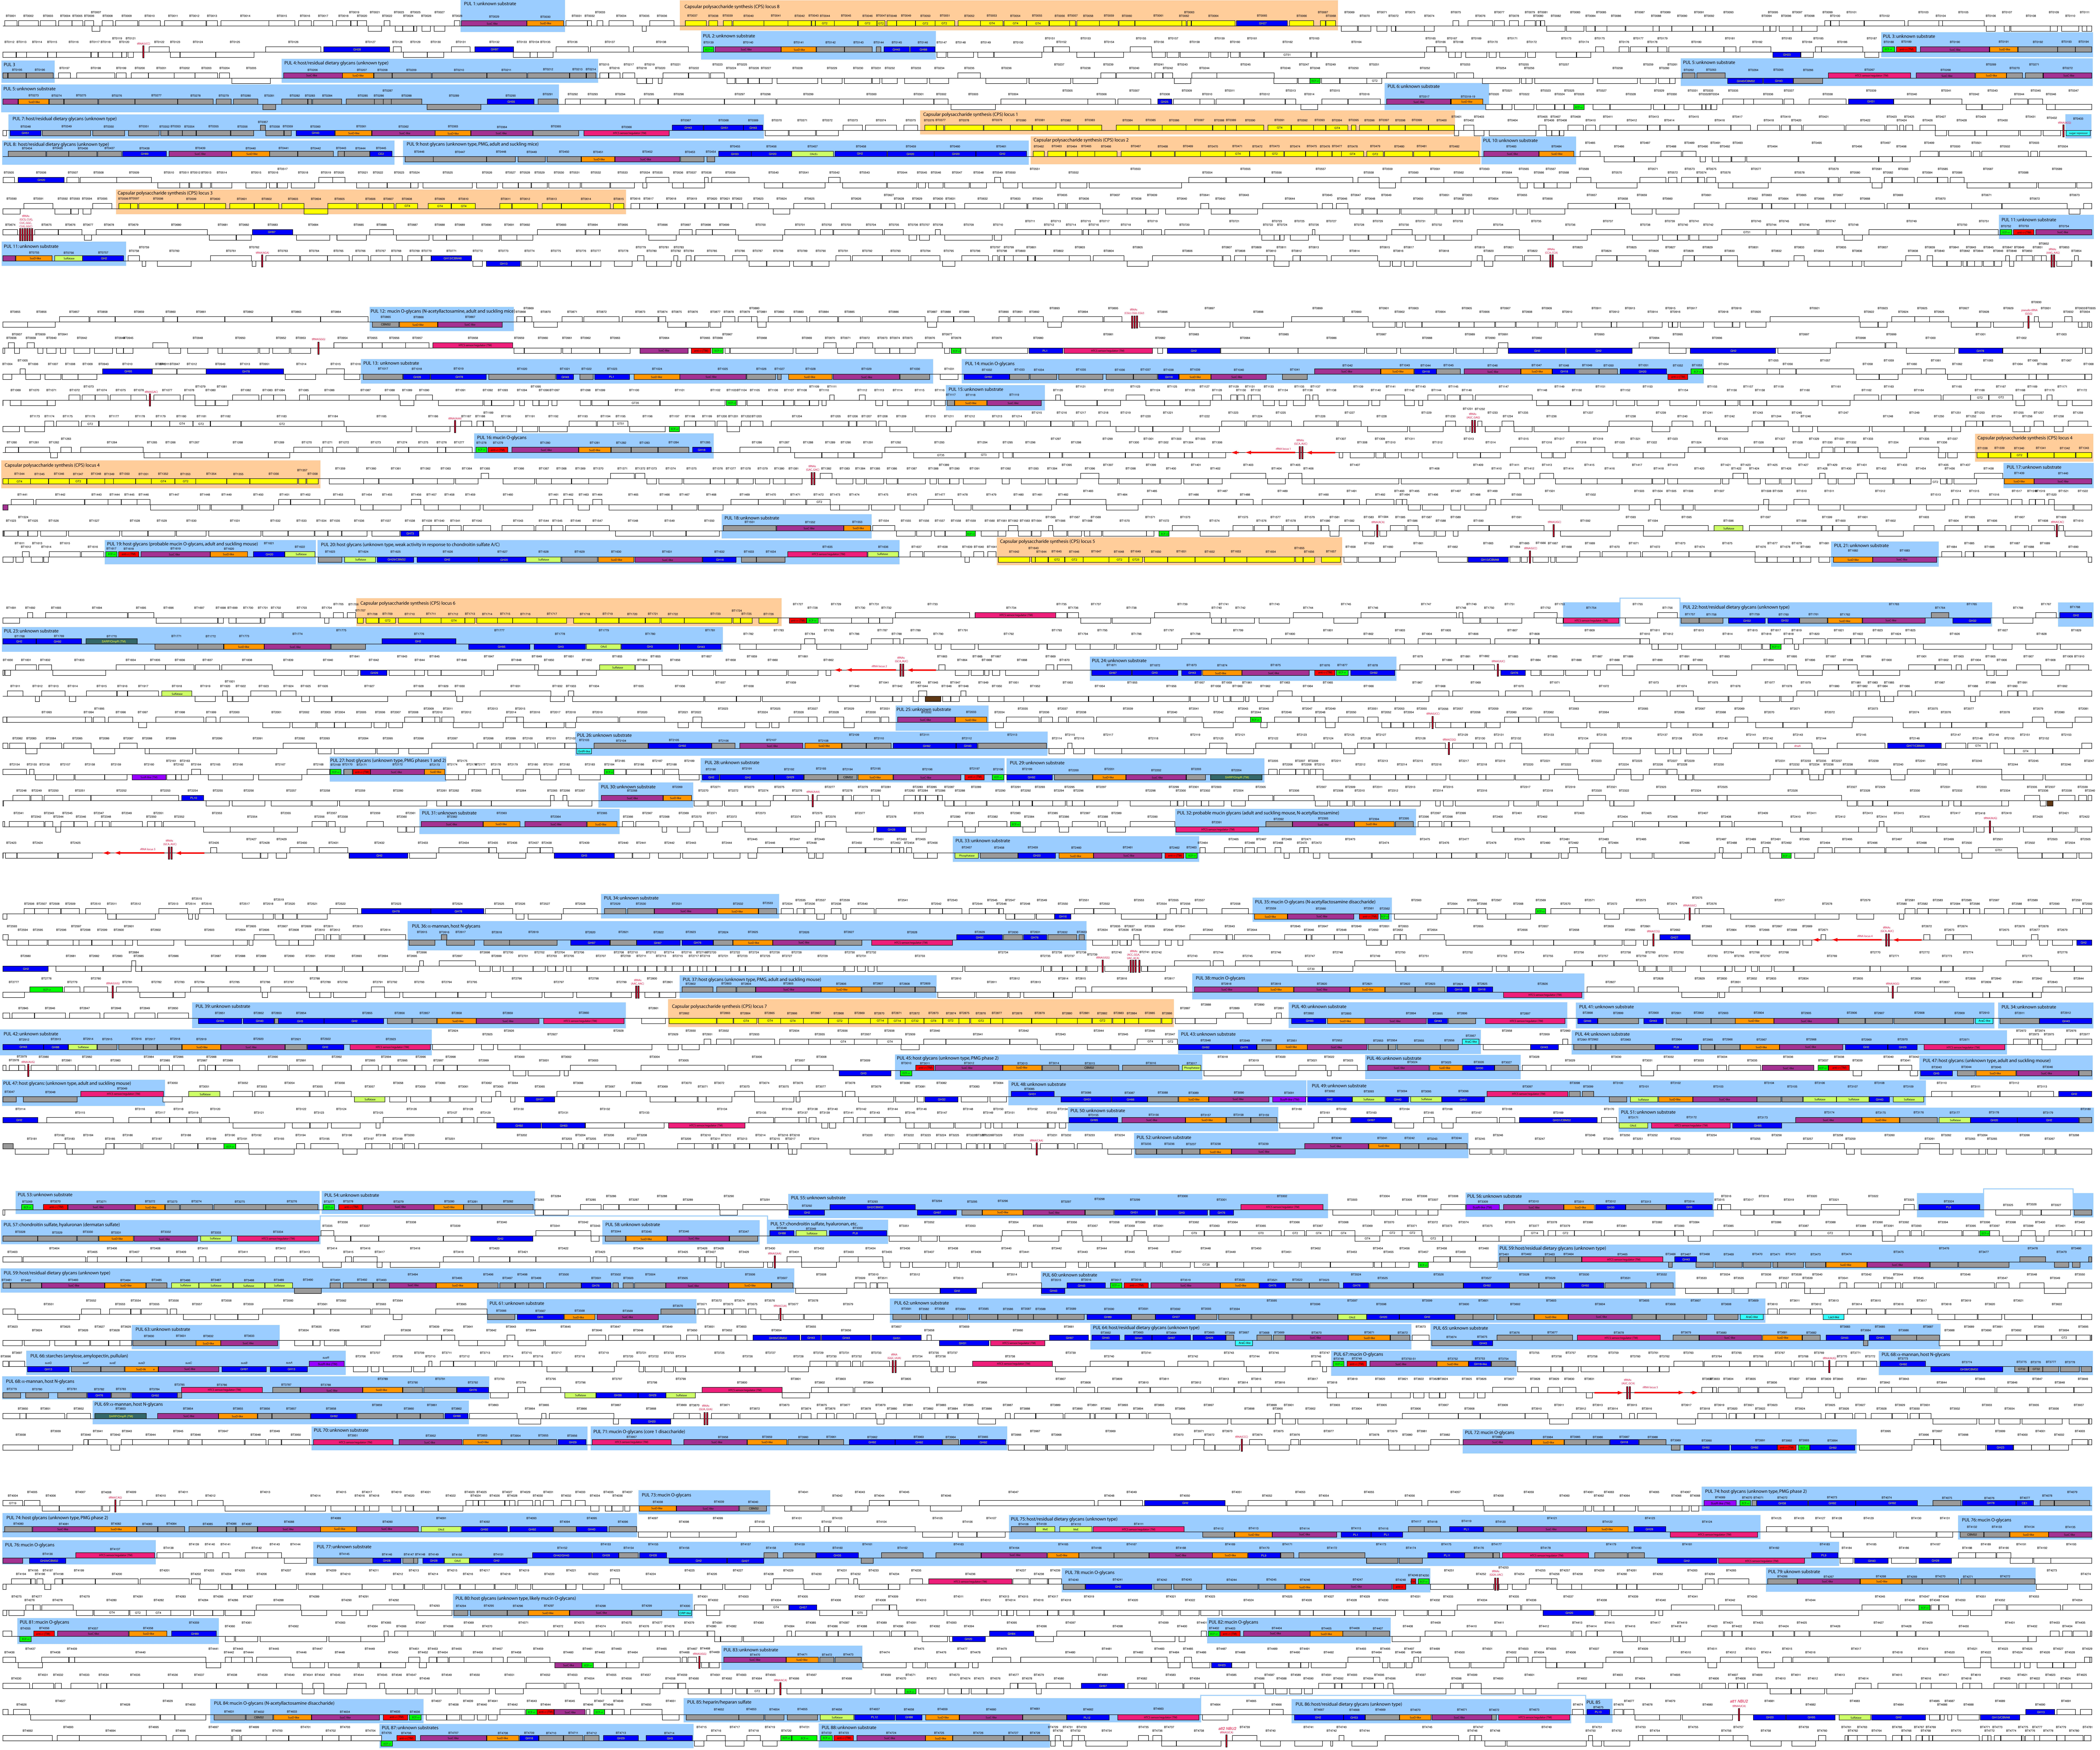

Supplement: NIHMS79825-supplement-02.pdf [file NIHMS79825-supplement-02.pdf]
